# Supplementary material for: Total Globulin Fraction at Diagnosis Could Forecast All-Cause Mortality during the Disease Course in Patients with Antineutrophil Cytoplasmic Antibody-Associated Vasculitis
Source: MDPI journal article supplement (doi:10.3390/jcm12124170), 2023-06-20
Supplement: s1 [file s1]

**Table S4. Cox hazards model analyses of TGF at AAV diagnosis for all-cause mortality in AAV patients during the disease course (including EGPA)**

| Variables                                  | Univariable |              |         | Multivariable |              |         |
|--------------------------------------------|-------------|--------------|---------|---------------|--------------|---------|
|                                            | HR          | 95% CI       | p value | HR            | 95% CI       | p value |
| Age (years)                                | 1.063       | 1.031, 1.095 | <0.001  | 1.036         | 1.000, 1.074 | 0.048   |
| Male sex (N, (%))                          | 2.702       | 1.430, 5.103 | 0.002   | 2.815         | 1.347, 5.880 | 0.006   |
| BMI (kg/m <sup>2</sup> )                   | 1.122       | 1.029, 1.225 | 0.010   | 1.084         | 0.971, 1.209 | 0.151   |
| Ex-smoker (N, (%))                         | 1.619       | 0.389, 6.732 | 0.508   |               |              |         |
| EGPA                                       | 0.078       | 0.011, 0.574 | 0.012   | 0.054         | 0.006, 0.468 | 0.008   |
| MPO-ANCA (or P-ANCA) positivity            | 1.409       | 0.699, 2.843 | 0.338   |               |              |         |
| PR3-ANCA (or C-ANCA) positivity            | 0.693       | 0.271, 1.772 | 0.444   |               |              |         |
| BVAS                                       | 1.082       | 1.038, 1.128 | <0.001  | 1.060         | 0.999, 1.124 | 0.052   |
| FFS                                        | 1.927       | 1.423, 2.609 | <0.001  | 1.463         | 0.988, 2.167 | 0.058   |
| T2DM                                       | 1.083       | 0.547, 2.143 | 0.819   |               |              |         |
| Hypertension                               | 1.129       | 0.600, 2.125 | 0.706   |               |              |         |
| Dyslipidaemia                              | 1.808       | 0.915, 3.574 | 0.088   |               |              |         |
| White blood cell count (/mm <sup>3</sup> ) | 1.000       | 1.000, 1.000 | 0.047   | 1.000         | 1.000, 1.000 | 0.161   |
| Haemoglobin (g/dL)                         | 0.787       | 0.680, 0.911 | 0.001   | 1.022         | 0.813, 1.285 | 0.850   |
| Platelet count (× 1000/mm <sup>3</sup> )   | 1.000       | 0.998, 1.002 | 0.765   |               |              |         |
| Fasting glucose (mg/dL)                    | 1.005       | 0.999, 1.010 | 0.112   |               |              |         |
| Blood urea nitrogen (mg/dL)                | 1.011       | 1.003, 1.019 | 0.005   | 0.997         | 0.982, 1.013 | 0.734   |
| Serum creatinine (mg/dL)                   | 1.139       | 1.014, 1.279 | 0.028   | 1.102         | 0.876, 1.386 | 0.406   |
| ESR (mm/hr)                                | 1.010       | 1.002, 1.019 | 0.013   | 0.993         | 0.980, 1.006 | 0.276   |
| CRP (mg/L)                                 | 1.008       | 1.004, 1.013 | <0.001  | 1.004         | 0.996, 1.012 | 0.317   |
| TGF ≥3.1 g/dL                              | 2.197       | 1.152, 4.192 | 0.017   | 2.350         | 1.101, 5.014 | 0.027   |

Because TGF is calculated by subtracting serum albumin levels from serum total protein levels, the two variables were excluded from the multivariable Cox analysis with TGF.

TGF: total globulin fraction; AAV: ANCA-associated vasculitis; ANCA: antineutrophil cytoplasmic antibody;

BMI: body mass index; MPO: myeloperoxidase; P: perinuclear; PR3: proteinase 3; C: cytoplasmic; BVAS:

Birmingham vasculitis activity score; FFS: five-factor score; T2DM: type 2diabetes mellitus; ESR: erythrocyte sedimentation rate; CRP: C-reactive protein.
