# Supplementary material for: Total Globulin Fraction at Diagnosis Could Forecast All-Cause Mortality during the Disease Course in Patients with Antineutrophil Cytoplasmic Antibody-Associated Vasculitis
Source: MDPI journal article supplement (doi:10.3390/jcm12124170), 2023-06-20
Supplement: s1 [file s1]

**Table S2. Cox hazards model analyses of TGF at diagnosis for all-cause mortality in AAV patients during the disease course (including traditional risk factors for all-cause mortality such as T2DM, hypertension and dyslipidaemia)**

| Variables                                  | Univariable |              |                | Multivariable |              |                |
|--------------------------------------------|-------------|--------------|----------------|---------------|--------------|----------------|
|                                            | HR          | 95% CI       | <i>p</i> value | HR            | 95% CI       | <i>p</i> value |
| Age (years)                                | 1.063       | 1.031, 1.095 | <0.001         | 1.032         | 0.998, 1.068 | 0.064          |
| Male sex (N, (%))                          | 2.702       | 1.430, 5.103 | 0.002          | 3.142         | 1.453, 6.793 | 0.004          |
| BMI (kg/m <sup>2</sup> )                   | 1.122       | 1.029, 1.225 | 0.010          | 1.123         | 1.007, 1.251 | 0.037          |
| Ex-smoker (N, (%))                         | 1.619       | 0.389, 6.732 | 0.508          |               |              |                |
| MPO-ANCA (or P-ANCA) positivity            | 1.409       | 0.699, 2.843 | 0.338          |               |              |                |
| PR3-ANCA (or C-ANCA) positivity            | 0.693       | 0.271, 1.772 | 0.444          |               |              |                |
| BVAS                                       | 1.082       | 1.038, 1.128 | <0.001         | 1.050         | 0.990, 1.113 | 0.102          |
| FFS                                        | 1.927       | 1.423, 2.609 | <0.001         | 1.422         | 0.972, 2.079 | 0.070          |
| T2DM                                       | 1.083       | 0.547, 2.143 | 0.819          | 0.707         | 0.319, 1.567 | 0.393          |
| Hypertension                               | 1.129       | 0.600, 2.125 | 0.706          | 0.902         | 0.428, 1.903 | 0.787          |
| Dyslipidaemia                              | 1.808       | 0.915, 3.574 | 0.088          | 2.068         | 0.875, 4.885 | 0.098          |
| White blood cell count (/mm <sup>3</sup> ) | 1.000       | 1.000, 1.000 | 0.047          | 1.000         | 1.000, 1.000 | 0.628          |
| Haemoglobin (g/dL)                         | 0.787       | 0.680, 0.911 | 0.001          | 0.944         | 0.752, 1.186 | 0.623          |
| Platelet count (× 1000/mm <sup>3</sup> )   | 1.000       | 0.998, 1.002 | 0.765          |               |              |                |
| Fasting glucose (mg/dL)                    | 1.005       | 0.999, 1.010 | 0.112          |               |              |                |
| Blood urea nitrogen (mg/dL)                | 1.011       | 1.003, 1.019 | 0.005          | 1.000         | 0.985, 1.016 | 0.984          |
| Serum creatinine (mg/dL)                   | 1.139       | 1.014, 1.279 | 0.028          | 1.085         | 0.868, 1.355 | 0.473          |
| ESR (mm/hr)                                | 1.010       | 1.002, 1.019 | 0.013          | 0.994         | 0.982, 1.007 | 0.375          |
| CRP (mg/L)                                 | 1.008       | 1.004, 1.013 | <0.001         | 1.003         | 0.996, 1.011 | 0.422          |
| TGF ≥3.1 g/dL                              | 2.197       | 1.152, 4.192 | 0.017          | 2.732         | 1.263, 5.911 | 0.011          |

TGF: total globulin fraction; AAV: ANCA-associated vasculitis; ANCA: antineutrophil cytoplasmic antibody; BMI: body mass index; MPO: myeloperoxidase; P: perinuclear; PR3: proteinase 3; C: cytoplasmic; BVAS: Birmingham vasculitis activity score; FFS: five-factor score; T2DM: type 2diabetes mellitus; ESR: erythrocyte sedimentation rate; CRP: C-reactive protein.
