# Supplementary material for: Total Globulin Fraction at Diagnosis Could Forecast All-Cause Mortality during the Disease Course in Patients with Antineutrophil Cytoplasmic Antibody-Associated Vasculitis
Source: MDPI journal article supplement (doi:10.3390/jcm12124170), 2023-06-20
Supplement: s1 [file s1]

**Table S1. Cox hazards model analyses of TGF at diagnosis for all-cause mortality in AAV patients during the disease course (including variables with  $p < 0.1$  in the univariate analysis)**

| Variables                                    | Univariable |              |                | Multivariable |              |                |
|----------------------------------------------|-------------|--------------|----------------|---------------|--------------|----------------|
|                                              | HR          | 95% CI       | <i>p</i> value | HR            | 95% CI       | <i>p</i> value |
| Age (years)                                  | 1.063       | 1.031, 1.095 | <0.001         | 1.033         | 0.998, 1.068 | 0.065          |
| Male sex (N, (%))                            | 2.702       | 1.430, 5.103 | 0.002          | 3.288         | 1.559, 6.937 | 0.002          |
| BMI (kg/m <sup>2</sup> )                     | 1.122       | 1.029, 1.225 | 0.010          | 1.118         | 1.004, 1.245 | 0.043          |
| Ex-smoker (N, (%))                           | 1.619       | 0.389, 6.732 | 0.508          |               |              |                |
| MPO-ANCA (or P-ANCA) positivity              | 1.409       | 0.699, 2.843 | 0.338          |               |              |                |
| PR3-ANCA (or C-ANCA) positivity              | 0.693       | 0.271, 1.772 | 0.444          |               |              |                |
| BVAS                                         | 1.082       | 1.038, 1.128 | <0.001         | 1.051         | 0.992, 1.114 | 0.092          |
| FFS                                          | 1.927       | 1.423, 2.609 | <0.001         | 1.413         | 0.967, 2.066 | 0.074          |
| T2DM                                         | 1.083       | 0.547, 2.143 | 0.819          |               |              |                |
| Hypertension                                 | 1.129       | 0.600, 2.125 | 0.706          |               |              |                |
| Dyslipidaemia                                | 1.808       | 0.915, 3.574 | 0.088          | 1.765         | 0.807, 3.858 | 0.155          |
| White blood cell count (/mm <sup>3</sup> )   | 1.000       | 1.000, 1.000 | 0.047          | 1.000         | 1.000, 1.000 | 0.602          |
| Haemoglobin (g/dL)                           | 0.787       | 0.680, 0.911 | 0.001          | 0.934         | 0.743, 1.175 | 0.561          |
| Platelet count ( $\times 1000/\text{mm}^3$ ) | 1.000       | 0.998, 1.002 | 0.765          |               |              |                |
| Fasting glucose (mg/dL)                      | 1.005       | 0.999, 1.010 | 0.112          |               |              |                |
| Blood urea nitrogen (mg/dL)                  | 1.011       | 1.003, 1.019 | 0.005          | 1.000         | 0.984, 1.015 | 0.976          |
| Serum creatinine (mg/dL)                     | 1.139       | 1.014, 1.279 | 0.028          | 1.090         | 0.873, 1.362 | 0.446          |
| ESR (mm/hr)                                  | 1.010       | 1.002, 1.019 | 0.013          | 0.995         | 0.982, 1.007 | 0.389          |
| CRP (mg/L)                                   | 1.008       | 1.004, 1.013 | <0.001         | 1.003         | 0.996, 1.010 | 0.448          |
| TGF $\geq 3.1$ g/dL                          | 2.197       | 1.152, 4.192 | 0.017          | 2.546         | 1.196, 5.418 | 0.015          |

TGF: total globulin fraction; AAV: ANCA-associated vasculitis; ANCA: antineutrophil cytoplasmic antibody;

BMI: body mass index; MPO: myeloperoxidase; P: perinuclear; PR3: proteinase 3; C: cytoplasmic; BVAS:

Birmingham vasculitis activity score; FFS: five-factor score; T2DM: type 2diabetes mellitus; ESR: erythrocyte sedimentation rate; CRP: C-reactive protein.
