# Supplementary material for: Total Globulin Fraction at Diagnosis Could Forecast All-Cause Mortality during the Disease Course in Patients with Antineutrophil Cytoplasmic Antibody-Associated Vasculitis
Source: MDPI journal article supplement (doi:10.3390/jcm12124170), 2023-06-20
Supplement: s1 [file s1]

**Table S3. Cox hazards model analyses of TGF at AAV diagnosis for all-cause mortality in AAV patients during the disease course (including serum total protein and albumin)**

| Variables                                  | Univariable |              |         | Multivariable |              |         |
|--------------------------------------------|-------------|--------------|---------|---------------|--------------|---------|
|                                            | HR          | 95% CI       | p value | HR            | 95% CI       | p value |
| Age (years)                                | 1.063       | 1.031, 1.095 | <0.001  | 1.034         | 1.001, 1.068 | 0.040   |
| Male sex (N, (%))                          | 2.702       | 1.430, 5.103 | 0.002   | 3.594         | 1.689, 7.647 | 0.001   |
| BMI (kg/m <sup>2</sup> )                   | 1.122       | 1.029, 1.225 | 0.010   | 1.120         | 1.008, 1.245 | 0.034   |
| Ex-smoker (N, (%))                         | 1.619       | 0.389, 6.732 | 0.508   |               |              |         |
| MPO-ANCA (or P-ANCA) positivity            | 1.409       | 0.699, 2.843 | 0.338   |               |              |         |
| PR3-ANCA (or C-ANCA) positivity            | 0.693       | 0.271, 1.772 | 0.444   |               |              |         |
| BVAS                                       | 1.082       | 1.038, 1.128 | <0.001  | 1.033         | 0.972, 1.098 | 0.297   |
| FFS                                        | 1.927       | 1.423, 2.609 | <0.001  | 1.511         | 1.011, 2.259 | 0.044   |
| T2DM                                       | 1.083       | 0.547, 2.143 | 0.819   |               |              |         |
| Hypertension                               | 1.129       | 0.600, 2.125 | 0.706   |               |              |         |
| Dyslipidaemia                              | 1.808       | 0.915, 3.574 | 0.088   |               |              |         |
| White blood cell count (/mm <sup>3</sup> ) | 1.000       | 1.000, 1.000 | 0.047   | 1.000         | 1.000, 1.000 | 0.770   |
| Haemoglobin (g/dL)                         | 0.787       | 0.680, 0.911 | 0.001   | 1.018         | 0.808, 1.282 | 0.882   |
| Platelet count (× 1000/mm <sup>3</sup> )   | 1.000       | 0.998, 1.002 | 0.765   |               |              |         |
| Fasting glucose (mg/dL)                    | 1.005       | 0.999, 1.010 | 0.112   |               |              |         |
| Blood urea nitrogen (mg/dL)                | 1.011       | 1.003, 1.019 | 0.005   | 1.007         | 0.991, 1.023 | 0.381   |
| Serum creatinine (mg/dL)                   | 1.139       | 1.014, 1.279 | 0.028   | 1.050         | 0.851, 1.295 | 0.648   |
| Serum total protein (g/dL)                 | 0.590       | 0.398, 0.874 | 0.008   | 2.858         | 0.940, 8.691 | 0.064   |
| Serum albumin (g/dL)                       | 0.369       | 0.239, 0.571 | <0.001  | 0.140         | 0.038, 0.519 | 0.003   |
| ESR (mm/hr)                                | 1.010       | 1.002, 1.019 | 0.013   | 0.989         | 0.976, 1.003 | 0.118   |
| CRP (mg/L)                                 | 1.008       | 1.004, 1.013 | <0.001  | 1.000         | 0.992, 1.008 | 0.913   |
| TGF ≥3.1 g/dL                              | 2.197       | 1.152, 4.192 | 0.017   | 1.018         | 0.322, 3.218 | 0.976   |

TGF: total globulin fraction; AAV: ANCA-associated vasculitis; ANCA: antineutrophil cytoplasmic antibody; BMI: body mass index; MPO: myeloperoxidase; P: perinuclear; PR3: proteinase 3; C: cytoplasmic; BVAS: Birmingham vasculitis activity score; FFS: five-factor score; T2DM: type 2diabetes mellitus; ESR: erythrocyte sedimentation rate; CRP: C-reactive protein.
